# Supplementary material for: Community-based pre-pregnancy care programme improves pregnancy preparation in women with pregestational diabetes
Source: Springer Nature journal article supplement (doi:10.1007/s00125-018-4613-3), 2018-05-09
Supplement: MOESM1 [file 15749304]

## **Electronic Supplementary Material**

### **Summary of organisations participating in the EAHSN pre-pregnancy care programme**

**ESM Table 1:** Maternal characteristics before and during/after implementation of pre-pregnancy care program

**ESM Table 2:** Pregnancy preparation before and during/after implementation of pre-pregnancy care program

**ESM Table 3:** Pregnancy outcomes before and during/after implementation of pre-pregnancy care program

**ESM Figure 1:** Pre-pregnancy care leaflet

**ESM Figure 2:** Electronic preconception care template

## Summary of organisations participating in the EAHSN prepregnancy care programme

### CCGs covered by EAHSN Diabetes Programme

NHS Norwich CCG  
Room 202  
City Hall  
St Peters Street  
Norwich  
NR2 1NH

NHS Ipswich and East Suffolk CCG  
Rushbrook House  
Paper Mill Lane  
Bramford  
Ipswich  
IP8 4DE

NHS North Norfolk CCG  
1 Mill Close  
Aylsham  
NR11 6LZ

NHS North East Essex CCG  
Aspen House  
Stephenson Road  
Severalls Business Park  
Colchester CO4 9QR

NHS South Norfolk CCG  
Lakeside 400  
Old Chapel Way  
Broadland Business Park  
Thorpe St Andrew  
Norwich  
Norfolk  
NR7 0WG

NHS Bedfordshire CCG  
Capability House  
Silsoe  
Bedfordshire  
MK45 4HR

NHS West Norfolk CCG  
Kings Court  
Chapel Street  
Kings Lynn  
PE30 1EL

NHS West Suffolk CCG  
West Suffolk House  
Western Way  
Bury St Edmunds  
Suffolk  
IP33 3YU

NHS Great Yarmouth and Waveney CCG  
1 Common Lane North  
Beccles  
NR34 9BN

NHS Cambridgeshire and Peterborough CCG  
Lockton House  
Clarendon Road  
Cambridge  
CB2 8FH

NHS East and North Hertfordshire CCG  
Charter House  
Parkway  
Welwyn Garden City  
Herts  
AL8 6JL

## Acute Trusts covered by EAHSN Diabetes Programme

Norfolk & Norwich University Hospitals NHS  
Foundation Trust  
Colney Lane  
Norwich  
NR4 7UY

James Paget University Hospitals NHS  
Foundation Trust  
Lowestoft Road  
Gorleston

Great Yarmouth  
Norfolk & Norwich University NHS Foundation  
Trust NR31 6L

The Queen Elizabeth Hospital, Kings Lynn, NHS  
Foundation Trust  
Gayton Road  
Kings Lynn  
PE30 4ET

Cambridge University Hospitals NHS  
Foundation Trust  
Cambridge Biomedical Campus  
Hills Road  
Cambridge  
CB2 0QQ

Hinchingbrooke Healthcare NHS Trust  
Hinchingbrooke Hospital  
Hinchingbrooke Park  
Huntingdon  
Cambridgeshire  
PE29 6NT

East & North Hertfordshire NHS Trust  
Lister Hospital  
Coreys Mill Lane  
Stevenage  
SG1 4AB

Ipswich Hospital NHS Trust  
Heath Road  
Ipswich  
IP4 5PD

Colchester Hospital University NHS Foundation  
Trust  
Colchester General Hospital  
Trust Offices  
Main Building  
Turner Road  
Colchester  
Essex  
CO4 5JL

Bedford Hospital NHS Trust  
South Wing  
Kempston Road  
Bedford  
MK41 9DJ

West Suffolk Hospital NHS Foundation Trust  
Hardwick Lane  
Bury St Edmunds  
Suffolk  
IP33 2QZ

**ESM Table 1:** Maternal characteristics before and during/after implementation of pre-pregnancy care (PPC) programme

|                                                       | Before PPC<br>n=502 | During/after PPC<br>n=340 | p-value |
|-------------------------------------------------------|---------------------|---------------------------|---------|
| Age in years at delivery – Mean (SD)                  | 32.5 (5.9)          | 31.4 (5.9)                | 0.0074  |
| Type of Diabetes – n (%)                              |                     |                           |         |
| Type 1 diabetes                                       | 308 (61.4)          | 205 (60.3)                | 0.77    |
| Type 2 diabetes                                       | 186 (37.1)          | 132 (38.8)                | 0.61    |
| Other                                                 | 8 (1.6)             | 3 (0.9)                   | 0.54    |
| Diabetes treatment at first visit – n (%)             |                     |                           |         |
| Insulin                                               | 348 (69.3)          | 245 (71.2)                | 0.40    |
| Metformin                                             | 163 (32.5)          | 116 (34.1)                | 0.66    |
| Secretagogue                                          | 11 (2.19)           | 3 (0.88)                  | 0.18    |
| DPP-4 Inhibitor                                       | 4 (0.8)             | 1 (0.29)                  | 0.65    |
| GLP-1 Inhibitor                                       | 2 (0.4)             | 2 (0.6)                   | 1.00    |
| Thiazolidinediones                                    | 1 (0.2)             | 1(0.3)                    | 1.00    |
|                                                       | n=501*              | n=340                     |         |
| Weight at booking in Kg – Mean (SD)                   | 78.9 (20.8)         | 80.6 (19.6)               | 0.24    |
| BMI at booking in kg/m <sup>2</sup> – Mean (SD)       | 29.3 (7.2)          | 29.8 (6.9)                | 0.29    |
| Normal (<24.9) – n (%)                                | 155 (30.9)          | 88 (25.9)                 | 0.12    |
| Overweight (25-29.9) – n (%)                          | 158 (31.5)          | 105 (30.9)                | 0.88    |
| Obese (≥30) – n (%)                                   | 188 (37.5)          | 147 (39.8)                | 0.099   |
|                                                       | n=285 <sup>a</sup>  | n=206                     |         |
| Documented retinopathy in the first trimester – n (%) | 130 (45.6)          | 89 (43.2)                 | 0.65    |
|                                                       | n=270               | n=201                     |         |
| Documented maculopathy in the first trimester – n (%) | 31 (11.5)           | 17 (8.46)                 | 0.36    |
|                                                       | n=258               | n=181                     |         |
| Documented retinopathy in the last trimester – n (%)  | 130 (50.4)          | 80 (44.2)                 | 0.21    |
|                                                       | n=252               | n=174                     |         |
| Documented maculopathy in the last trimester – n (%)  | 24 (9.5)            | 9 (5.2)                   | 0.14    |
|                                                       | n=452               | n=339                     |         |
| Documented ischemic heart disease – n (%)             | 1 (0.2)             | 2(0.6)                    | 0.58    |
|                                                       | n=454               | n=340                     |         |
| Treated hypertension – n (%)                          | 20 (4.4)            | 24 (7.1)                  | 0.12    |

\*These n values refer to the number of participants for which these data were available for each measure.

<sup>a</sup> There were substantial missing data for retinopathy measures because retinal screening data items are poorly captured in National Pregnancy in Diabetes (NPID).

**ESM Table 2:** Measures of pregnancy preparation before and during/after implementation of pre-pregnancy care programme (PPC)

|                                                            | Before PPC<br>n=502 | During/after PPC<br>n=340 | p-value |
|------------------------------------------------------------|---------------------|---------------------------|---------|
|                                                            | n=496               | n=340                     |         |
| Gestational age at booking in weeks – mean (SD)            | 9.2 (4.0)           | 8.5 (4.3)                 | 0.021   |
| Booking prior to 8 weeks – n (%)                           | 229 (46.2)          | 193 (56.8)                | 0.003   |
|                                                            | n=472*              | n=331                     |         |
| HbA <sub>1c</sub> at first contact in mmol/mol – mean (SD) | 58.1 (17.7)         | 56.9 (17.2)               | 0.34    |
| HbA <sub>1c</sub> at first contact in % – mean (SD)        | 7.5 (3.8)           | 7.4 (3.7)                 | 0.34    |
| HbA <sub>1c</sub> at target ( $\leq 48$ mmol/mol) – n (%)  | 148 (31.4)          | 124 (37.5)                | 0.081   |
|                                                            | n=459               | n=321                     |         |
| Folic acid any dose – n (%)                                | 250 (54.5)          | 189 (58.9)                | 0.24    |
|                                                            | n=456               | n=320                     |         |
| Folic acid dose of 5mg dose – n (%)                        | 217 (47.6)          | 166 (51.9)                | 0.24    |
|                                                            | n=451               | n=338                     |         |
| On at least one harmful medication <sup>a</sup> – n (%)    | 37 (8.2)            | 19 (5.6)                  | 0.21    |
| On 2 or more harmful medications – n (%)                   | 7 (1.6)             | 2 (0.6)                   | 0.31    |
|                                                            | n=379               | n=312                     |         |
| Optimal pregnancy preparation <sup>b</sup> – n (%)         | 36 (9.5)            | 50 (16.0)                 | 0.011   |

\*These n values refer to the number of participants for which these data were available for each measure.

<sup>a</sup> Harmful medications include: secretagogues, dipeptidyl peptidase-4 (DPP-4) inhibitors, glucagon-like peptide-1 (GLP-1) agonists, thiazolidinedione, angiotensin converting enzyme inhibitor/angiotensin receptor blockers, and statin

<sup>b</sup> Optimal pregnancy preparation defined as: first HbA<sub>1c</sub>  $\leq 48$  mmol/mol, on folic acid 5mg prior to last menstrual period, booking at  $\leq 8$  weeks gestation, and no harmful medications prior to last menstrual period

**ESM Table 3:** Pregnancy outcomes before and during/after implementation of pre-pregnancy care programme (PPC)

|                                             | Before PPC<br>n=493 | During/After PPC<br>n=336 | p-value |
|---------------------------------------------|---------------------|---------------------------|---------|
| Pregnancy outcome <sup>a</sup>              |                     |                           |         |
| Live birth – n (%)                          | 457 (92.7)          | 313 (93.2)                | 0.89    |
| Miscarriage – n (%)                         | 27 (5.5)            | 19 (5.7)                  | 1.00    |
| Termination – n (%)                         | 5 (1.0)             | 1 (0.3)                   | 0.41    |
|                                             |                     |                           |         |
| Delivery <sup>b</sup>                       | n=452*              | n=316                     |         |
| Gestational age at delivery – Mean (SD)     | 37.1 (2.1)          | 37.0 (1.7)                | 0.78    |
|                                             |                     |                           |         |
| Prematurity                                 |                     |                           |         |
| <37 weeks – n (%)                           | 134 (29.7)          | 114 (36.1)                | 0.071   |
| <34 weeks – n (%)                           | 34 (7.5)            | 16 (5.1)                  | 0.19    |
|                                             | n=460               | n=314                     |         |
| Birthweight (g) – Mean (SD)                 | 3233.7 (685.6)      | 3347.0 (636.3)            | 0.48    |
| Infant birth centiles <sup>c</sup>          | n=450               | n=314                     |         |
| Large for gestational age – n (%)           | 154 (34.2)          | 115 (36.6)                | 0.54    |
| Extremely large for gestational age – n (%) | 97 (21.6)           | 73 (23.3)                 | 0.60    |
| Small for gestational age – n (%)           | 45 (10.0)           | 22 (7.0)                  | 0.16    |
|                                             | n=456               | n=313                     |         |
| Advanced neonatal care – n (%)              | 184 (40.4)          | 153 (48.9)                | 0.022   |
|                                             |                     |                           |         |
| Other pregnancy outcomes                    | n=441               | n=301                     |         |
| Congenital malformation – n (%)             | 15 (3.4)            | 18 (6.0)                  | 0.10    |
|                                             | n=461               | n=316                     |         |
| Stillbirth – n (%)                          | 4 (0.9)             | 3 (1.0)                   | 1.00    |
|                                             | n=442               | n=290                     |         |
| Neonatal death – n (%)                      | 3 (0.7)             | 0 (0)                     | 0.28    |
|                                             | n=446               | n=293                     |         |
| Perinatal mortality – n (%)                 | 7 (1.6)             | 3 (1.0)                   | 0.75    |
|                                             | n=428               | n=286                     |         |
| Serious adverse outcome – n (%)             | 21 (4.9)            | 21 (7.3)                  | 0.20    |

\*These n values refer to the number of participants for which these data were available for each measure.

<sup>a</sup> These outcomes are applicable only for singleton pregnancies. There was a total of 13 twin gestations (9 (1.8%) pre-PPC and 4 (1.2%) post-PPC. No twin pregnancy ended in stillbirth or neonatal death.

<sup>b</sup> Reported on live and stillbirths

<sup>c</sup> Large for gestational age >90<sup>th</sup> centile, extremely large for gestational age >97.7<sup>th</sup> centile, small for gestational age <10<sup>th</sup> centile as per GROW customised centiles

<sup>d</sup> Serious adverse outcome: malformation with or without termination of pregnancy, stillbirth, or neonatal death

ESM Figure 1: Pre-pregnancy care leaflet

**Already pregnant? We can help.**  
If you are pregnant and you didn't plan your pregnancy we can help you. The specialist team at the hospital will see you as soon as possible to give you support, information and care.

**This is what you need to do**

- As soon as you can, contact your GP/diabetes team. They will assist with:
  - A referral to the maternity unit. You can expect an appointment within 1-2 weeks
  - Getting a prescription for Folic Acid. You may need a 5mg dose and this is only available by prescription
  - A review of your medications
- Start testing your blood glucose levels before meals, 1 hour after meals, and before bed so that your diabetes treatment can be safely adjusted.



**Remember...**  
Your diabetes team are here to help you! We can help you with contraception, planning your pregnancy and help you to have a healthy baby. If you have any questions about contraception or pregnancy get in contact today.

**The Eastern Academic Health Science Network**  
eahsn.org.uk is working with local healthcare teams to support women with diabetes who are planning pregnancy.  
Email: [EAHSN.diabetes@nhs.net](mailto:EAHSN.diabetes@nhs.net)

---

**Useful resources/links**

[fpa.org.uk](http://fpa.org.uk) The website of the Family Planning Association – all you ever wanted to know about contraceptive methods, plus an easy-to-use tool to find the best contraceptive methods for you.

[diabetes.org.uk](http://diabetes.org.uk) Good section on pregnancy in the "Living with diabetes" section, on contraception in the "teenagers" section, and giving up smoking advice.

[womenwithdiabetes.net](http://womenwithdiabetes.net) Lots of information, video clips and other women's stories

[gofolic.org.uk](http://gofolic.org.uk) Information on the benefits of folic acid and the Before You Folic, Go Folic Campaign.

Pregnant with diabetes app Free from Google play. Loads of information including planning for pregnancy

---

If this information has come at a bad time, causes you concern or is not relevant to you, please accept our sincere apologies and feel free to let us know.

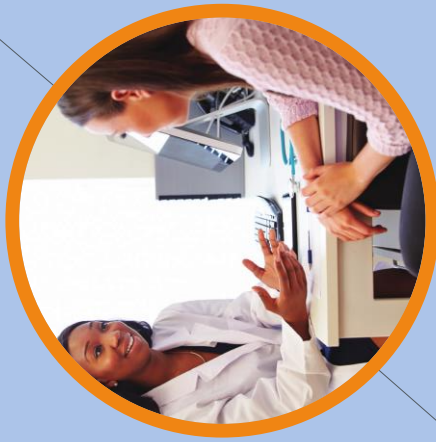

## Sex, contraception and pregnancy

Important information for women with Type 1 and Type 2 diabetes

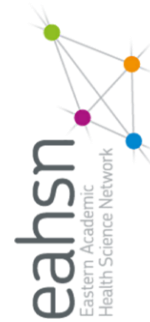

## Why a bit of planning is important

If you have Type 1 or Type 2 diabetes and are having sex it is important to think about contraception and pregnancy.

### Contraception

If you are having sex and are not planning on having a baby soon, talk to your GP about the safest and best contraception for you. Your diabetes team can help you with more information also.

### Thinking about getting pregnant

Most women with diabetes have normal pregnancies resulting in healthy babies. However, having diabetes can increase the chance of serious complications both for you and your baby. We also know the first 6 weeks of pregnancy is the most crucial for your baby's development. If you are thinking about having a baby, planning for pregnancy and looking after yourself is important for you and your baby's health. Try and see your GP/ practice nurse or the diabetes team as soon as you start thinking about having a baby. The earlier the better, and even 6–12 months before stopping contraception is a great time to start the discussion.

### Risks and complications

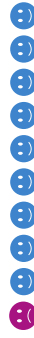

For women with diabetes who do not plan their pregnancy, the risk of a serious complication (e.g. stillbirth, serious heart or birth defect) is about 1 in 10.

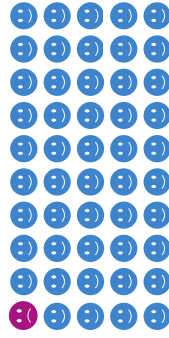

Reassuringly, if you do plan your pregnancy with your diabetes team, your risk of serious complications falls closer to that of women without diabetes (1 in 50).

## The best advice we can give you is to try not to leave things to chance

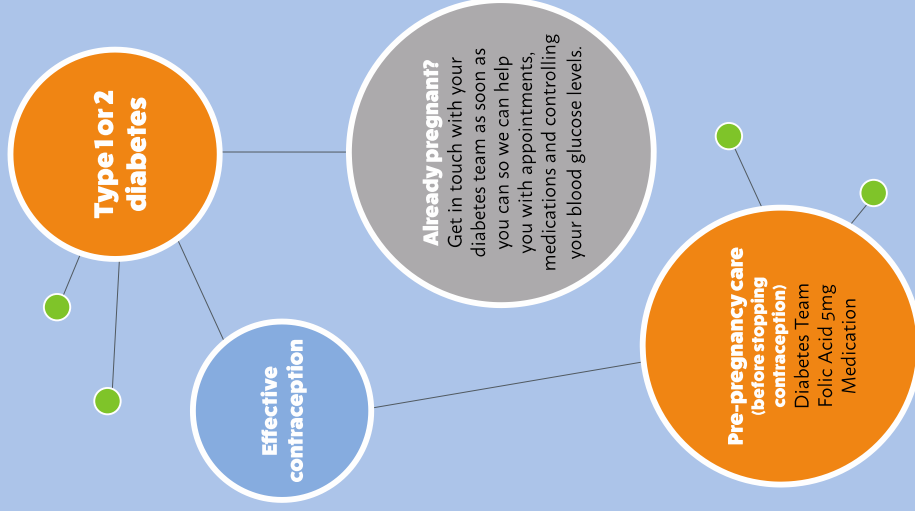

## You can reduce your risk of complications during pregnancy

### 1. Plan ahead

Make an appointment with your diabetes team if you are thinking of becoming pregnant and they will work with you to help you be the healthiest you can be.

### 2. Control your blood glucose levels

Try and get your HbA<sub>1c</sub> as close to 48 mmol/mol or 6.5% as you can safely get it (without hypoglycaemia). Test your blood glucose levels before and 1 hour after meals, and before bed.

### 3. Start taking 5mg Folic Acid tablets daily

Start before conception to help prevent birth defects (especially heart and spine). You will need a prescription for this from your GP.

### 4. Have your medications reviewed

Particularly blood pressure, cholesterol and diabetes tablets as not all are safe in early pregnancy. Your doctor will help you decide which ones to continue and which to stop or swap to a safer alternative.

### 5. See a specialist dietician

Discuss pregnancy nutrition with a dietician to help you and your baby to have the best possible health.

### 6. Ask for help to stop smoking

If you are a smoker a stop-smoking specialist can help you, refer yourself, or ask the diabetes team about a referral.



ESM Figure 2: Electronic preconception care template

**C&P Preconception for diabetic patients**

Preconception care

Uses contraception  

No current contraception  

**Ensure the woman has received LARC advice in the last 12 months**

Advice about long acting reversible contraception  

Long acting reversible contraception declined  

Is **she planning a pregnancy**, if so consider the following before stopping any contraceptive;

- > prescribe folic acid 5mg
- > review medication (change medication if appropriate)
- > check when renal & retinal screening was last completed
- > ensure HbA1c is close to 6.5% (48mmol/mol)
- > smoking cessation

Planning a pregnancy   Not currently trying to conceive  

Pre-conception advice received   Pre-conception advice declined  

Consider her for a **referral** to a **diabetes specialist team**, if the patient;

- > has poor glycaemic control (**HbA1c above 7% or 53mmol**)
- > has BMI of 30 or above
- > has poor medical or obstetric history
- > requests

Referral to diabetes preconception clinic  

If she is interested in a **referral** for **fertility investigations**, the following should be investigated prior to referral:

- > Current HbA1c
- > Current BMI
- > Current thyroid function test

C&P Preconception view cannot be shown without a patient

Information Print Suspend Ok Cancel
